# Supplementary material for: Singlet oxygen imaging using fluorescent probe Singlet Oxygen Sensor Green in photosynthetic organisms
Source: PubMed Central journal article supplement (PMC6135792; doi:10.1038/s41598-018-31638-5), 2018-09-12
Supplement: 41598_2018_31638_MOESM1_ESM.pdf [file 41598_2018_31638_MOESM1_ESM.pdf]

# **Singlet oxygen imaging using fluorescent probe Singlet Oxygen Sensor Green in photosynthetic organisms**

Ankush Prasad<sup>1\*</sup>, Michaela Sedlářová<sup>2\*</sup>, Pavel Pospíšil<sup>1#</sup>

\*The author's contributed equally to the manuscript

<sup>1</sup>Department of Biophysics, Centre of the Region Haná for Biotechnological and Agricultural Research, Faculty of Science, Palacký University, Šlechtitelů 27, 783 71 Olomouc, Czech Republic

<sup>2</sup>Department of Botany, Faculty of Science, Palacký University, Šlechtitelů 27, 783 71, Olomouc, Czech Republic

**#Corresponding author**

E.mail: pavel.pospisil@upol.cz

# Supplementary Fig. S1

## *Synechocystis* PC6803

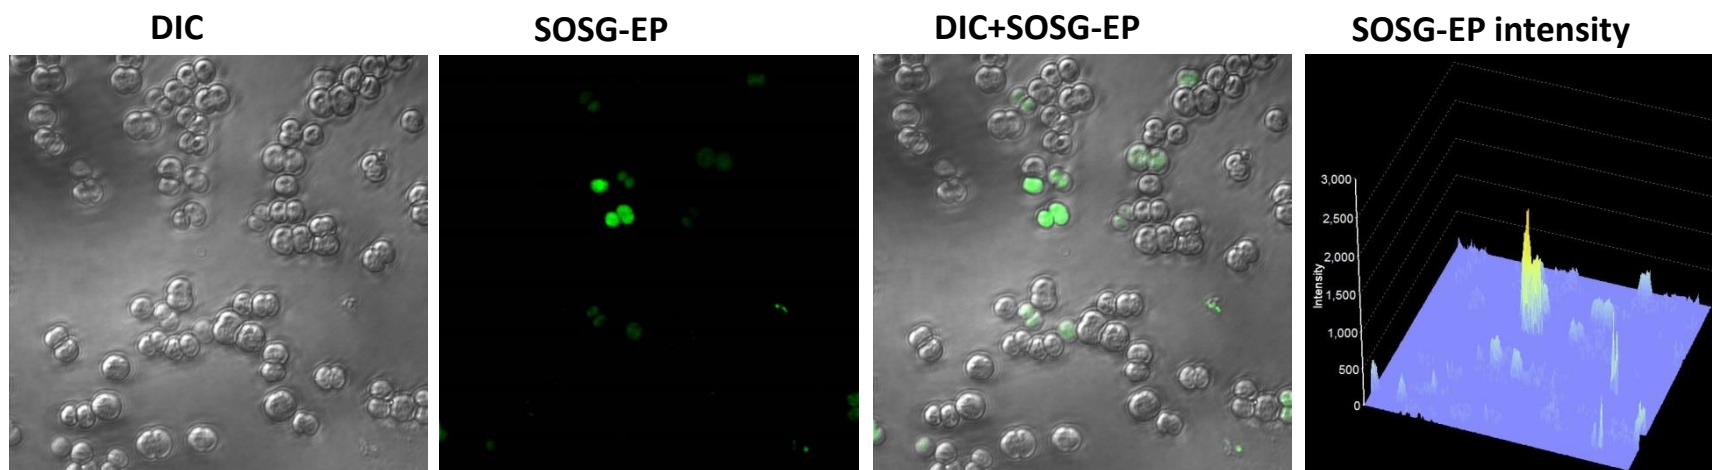

### Biological replicate 2

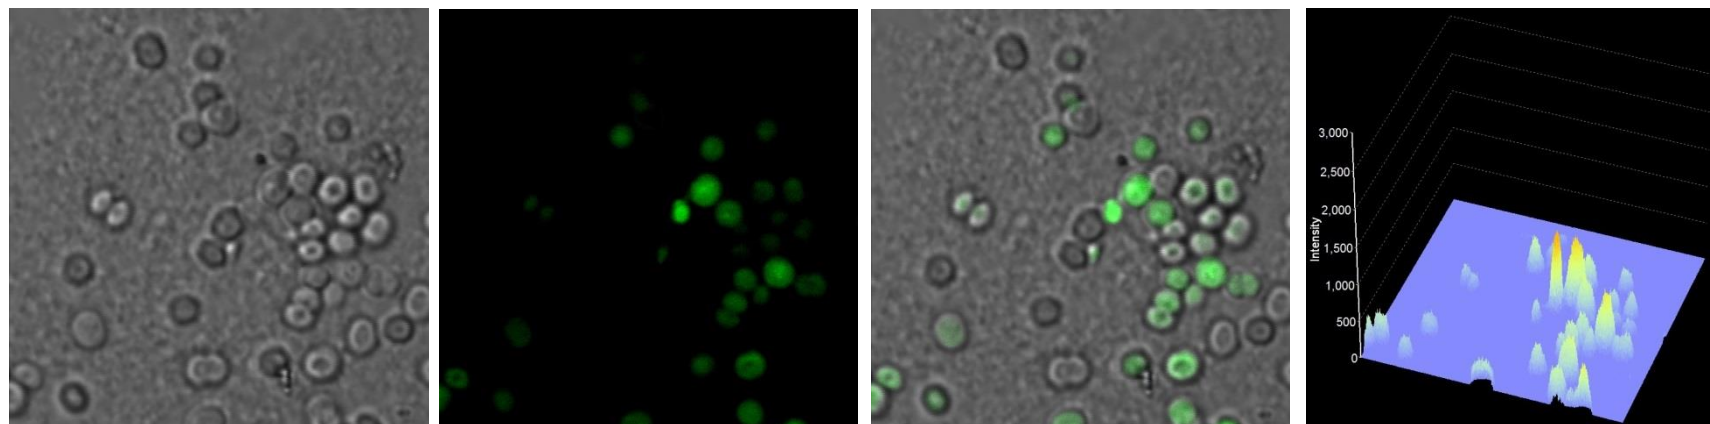

### Biological replicate 3

**Figure S1: Biological replicates on effect of red light on singlet oxygen imaging in *Synechocystis* cells.** *Synechocystis* cells were treated in 50 mM SOSG for 30 min at 37°C. For each treatment following images are presented (from left to right): Nomarski DIC, SOSG-EP fluorescence ( $\lambda_{em} = 505\text{--}525$  nm), combined channel and integral distribution of the signal intensity within the sample (Z-axis represents the levels of brightness for each pixel, ranging between 0 and 3000).

## Supplementary Fig. S2

### *Chlamydomonas reinhardtii*

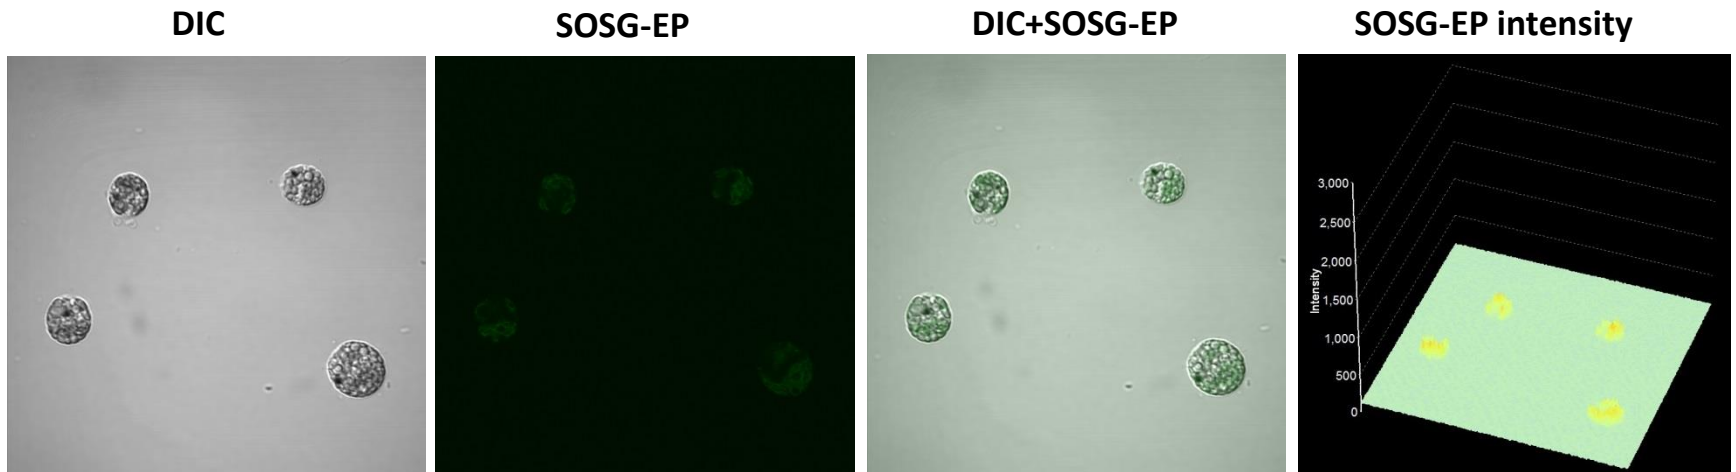

### Biological replicate 2

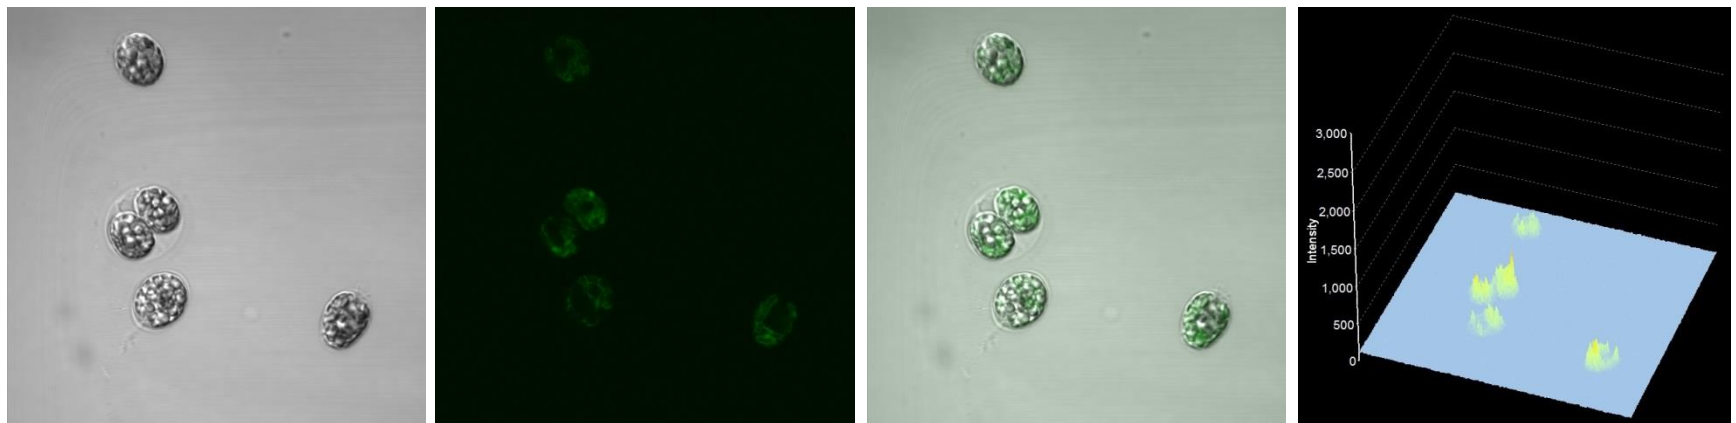

### Biological replicate 3

**Figure S2: Biological replicates on effect of red light on singlet oxygen imaging in *Chlamydomonas* cells.** *Chlamydomonas* cells were treated in 50 mM SOSG for 30 min. For each treatment following images are presented (from left to right): Nomarski DIC, SOSG-EP fluorescence ( $\lambda_{em} = 505\text{--}525\text{ nm}$ ), combined channel and integral distribution of the signal intensity within the sample (Z-axis represents the levels of brightness for each pixel, ranging between 0 and 3000).

## Supplementary Fig. S3

### *Arabidopsis thaliana*

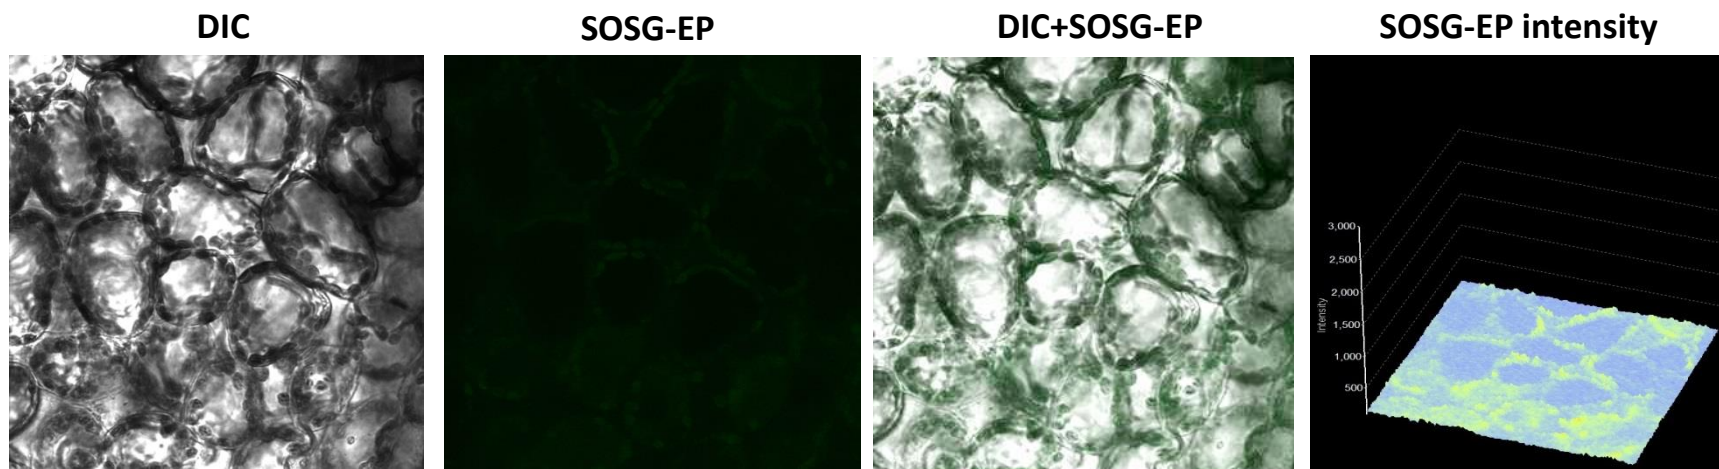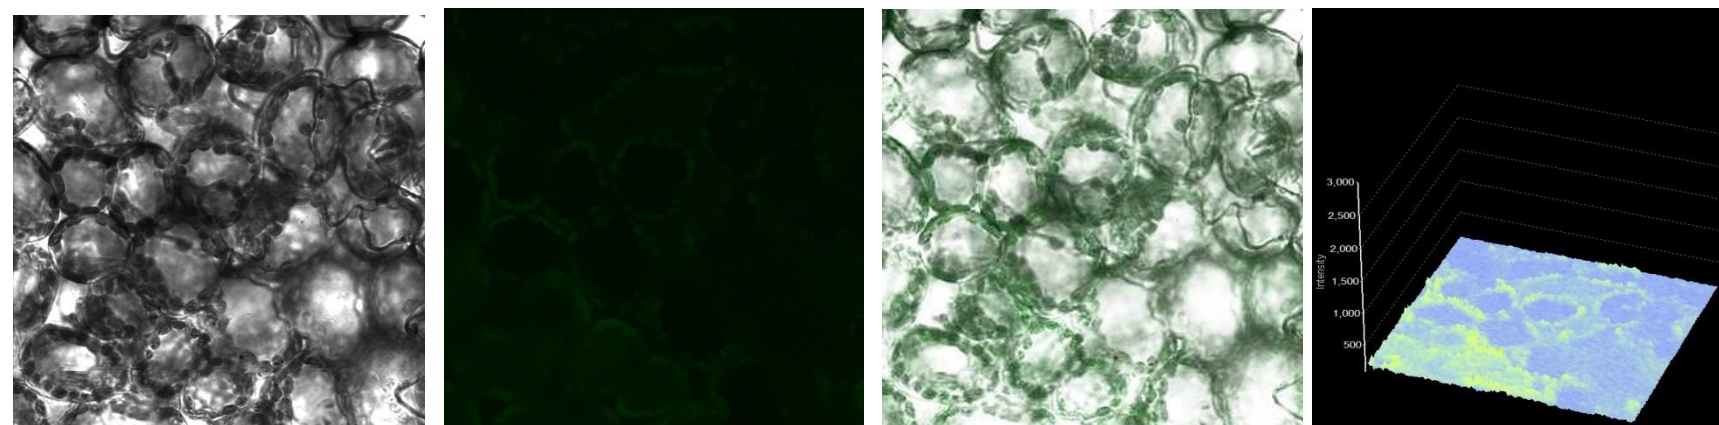

**Figure S3: Biological replicates on effect of red light on singlet oxygen imaging in *Arabidopsis* leaves.** *Arabidopsis* leaves were treated in 50 mM SOSG for 30 min. For each treatment following images are presented (from left to right): Nomarski DIC, SOSG-EP fluorescence ( $\lambda_{em} = 505\text{--}525\text{ nm}$ ), combined channel and integral distribution of the signal intensity within the sample (Z-axis represents the levels of brightness for each pixel, ranging between 0 and 3000).

## Supplementary Fig. S4

### *Chlamydomonas reinhardtii*

DIC

SOSG-EP

DIC+SOSG-EP

SOSG-EP intensity

Red light (30 min)

+sodium azide

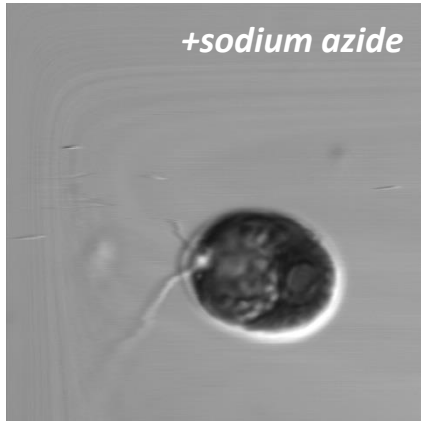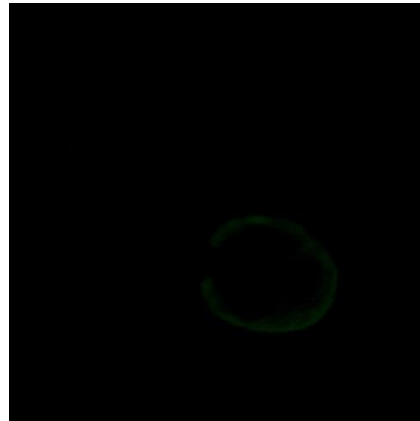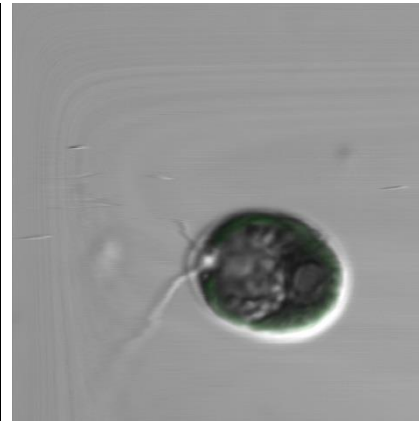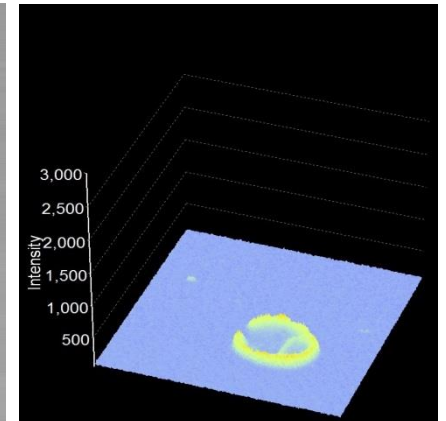

Biological replicate 1

Red light (30 min)

+sodium azide

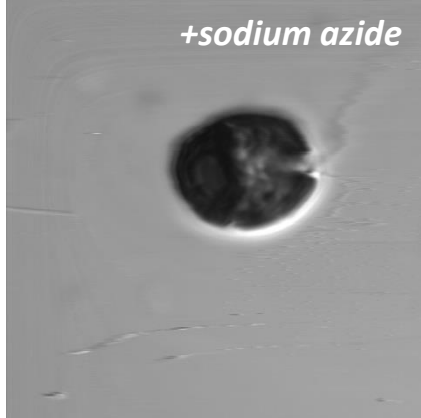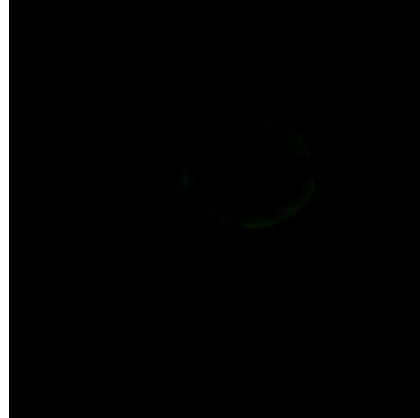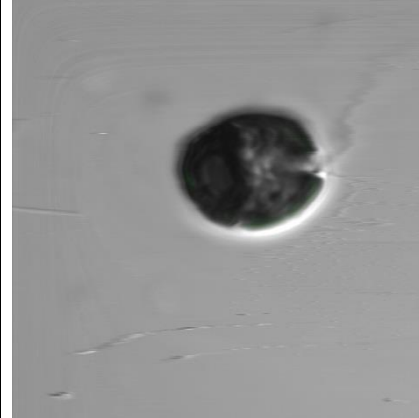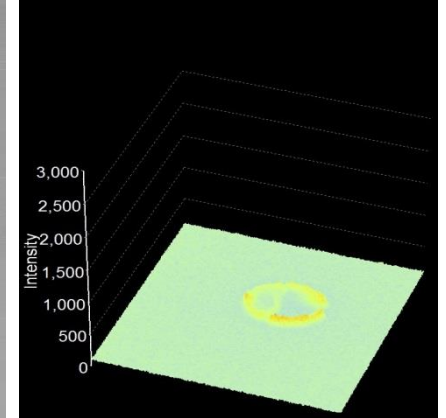

Biological replicate 2

**Figure S4: Singlet oxygen imaging in *Chlamydomonas* cells and effect of scavengers.** *Chlamydomonas* cells were treated in 50 mM SOSG for 30 min in the presence of 0.1% sodium azide (NaH). For each treatment following images are presented (from left to right): Nomarski DIC, SOSG-EP fluorescence ( $\lambda_{em} = 505\text{--}525$  nm), combined channel and integral distribution of the signal intensity within the sample (Z-axis represents the levels of brightness for each pixel, ranging between 0 and 3000).

## Supplementary Fig. S5

### *Chlamydomonas reinhardtii*

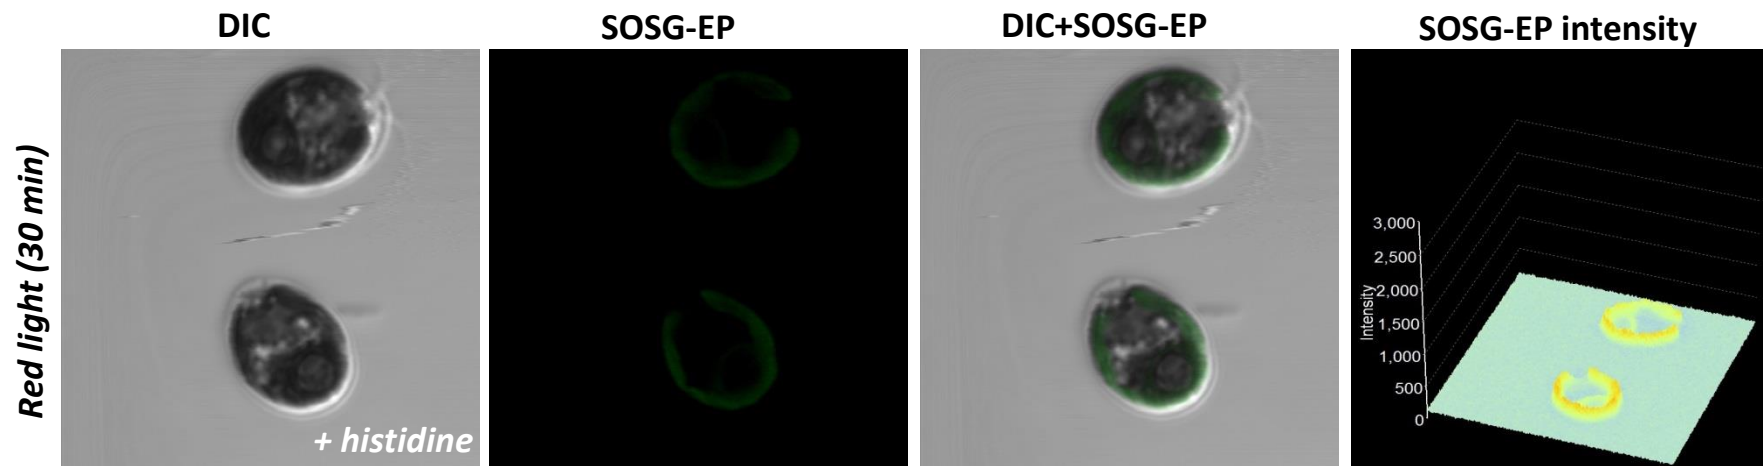

### Biological replicate 1

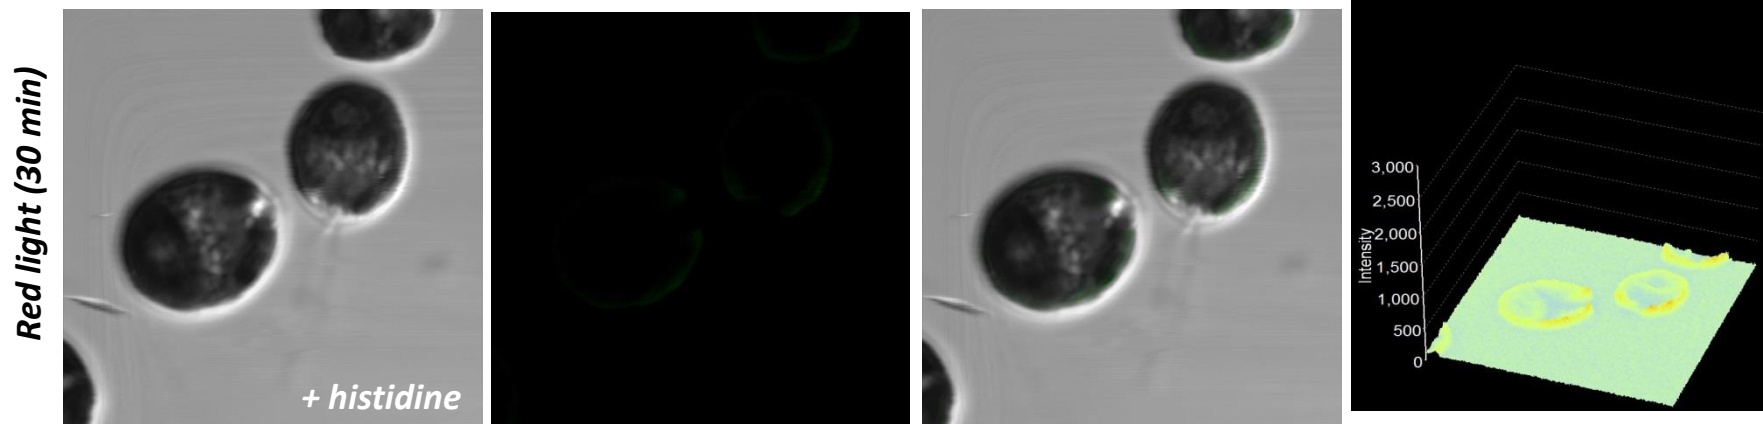

### Biological replicate 2

**Figure S5: Singlet oxygen imaging in *Chlamydomonas* cells and effect of scavengers.** *Chlamydomonas* cells were treated in 50 mM SOSG for 30 min in the presence of 500  $\mu$ M Histidine. For each treatment following images are presented (from left to right): Nomarski DIC, SOSG-EP fluorescence ( $\lambda_{em} = 505\text{--}525$  nm), combined channel and integral distribution of the signal intensity within the sample (Z-axis represents the levels of brightness for each pixel, ranging between 0 and 3000).
